# Supplementary material for: Parallel genome-scale loss of function screens in 216 cancer cell lines for the identification of context-specific genetic dependencies
Source: Springer Nature journal article supplement (doi:10.1038/sdata.2014.35), 2014-09-29
Supplement: 41597_2014_BFsdata201435_MOESM47_ESM.pdf [file 41597_2014_BFsdata201435_MOESM47_ESM.pdf]

# Data processing and analysis workflow

## Achilles data processing GenePattern pipeline

The *FilterLowshRNAs* module produces two matched output files: 1) initial DNA pool values and 2) cell line values, per shRNA. All modules until the *shRNAfoldChange* module are run on both.

### Quality control GenePattern modules

FPmatching

ReplicatesQC

**Supplemental Figure 1** outlines the GenePattern modules available for quality control, data processing, normalization, and downstream data analysis of Achilles data. All are available as individual GenePattern modules (<http://genepattern.org>)

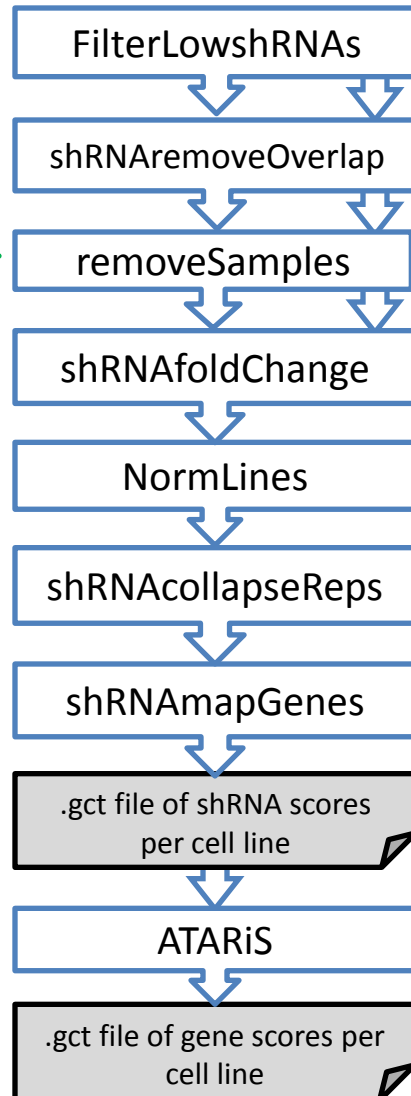

### Removes undesirable shRNAs and cell line replicates:

- Those shRNAs low in initial DNA pool or that overlap in sequence.
- Replicate samples that fail QC

- Calculates fold change values between initial DNA pool values and final cell line values.
- Normalizes cell lines to the same scale (quantile, ZMAD, PMAD)
- Collapses replicate cell line samples to a single values per shRNA
- Maps shRNAs to gene symbols based on a mapping file

PARIS
